# Supplementary material for: Prognostic and chemotherapeutic implications of a novel four-gene pyroptosis model in head and neck squamous cell carcinoma
Source: PeerJ. 2024 May 13;12:e17296. doi: 10.7717/peerj.17296 (PMC11097961; doi:10.7717/peerj.17296)
Supplement: Supplemental Information 2 [file peerj-12-17296-s002.xlsx]

## Sheet: Sheet1
The half-maximum inhibitory concentration (IC50) of cisplatin in chemosensitivity assay
Cells	IC50 of Cisplatin(uM)
HSC-4	4.729
CAL-27	3.93
SCC-9	5.676
UM1	11.88
HN4	3.166
HN12	7.489
HN30	2.275
H314	6.26
CAL-33	2.944
H103	3.157
H357	3.117
H376	2.472
SCC-25	4.636
SCC-47	3.681
