# Supplementary material for: Prognostic and chemotherapeutic implications of a novel four-gene pyroptosis model in head and neck squamous cell carcinoma
Source: PeerJ. 2024 May 13;12:e17296. doi: 10.7717/peerj.17296 (PMC11097961; doi:10.7717/peerj.17296)
Supplement: Supplemental Information 3 [file peerj-12-17296-s003.xlsx]

## Sheet: Sheet1
The half-maximum inhibitory concentration (IC50) of 5-Fluorouracil in chemosensitivity assay
Cells	IC50 of 5-Fluorouracil(uM)
HSC-4	6.133
CAL-27	7.958
HN4	5.067
H314	87.98
CAL-33	6.783
H103	33.39
H357	5.43
H376	17.81
SCC-25	43.23
