# Supplementary material for: Prognostic and chemotherapeutic implications of a novel four-gene pyroptosis model in head and neck squamous cell carcinoma
Source: PeerJ. 2024 May 13;12:e17296. doi: 10.7717/peerj.17296 (PMC11097961; doi:10.7717/peerj.17296)
Supplement: Supplemental Information 5 [file peerj-12-17296-s005.xls]

## Sheet: Sheet1
ITEM TO CHECK	IMPORTANCE	CHECKLIST	Page/line number in the manuscript
EXPERIMENTAL DESIGN
Definition of experimental and control groups	E	No control group	Page 7, line 1
Number within each group	E	16	Page 7, line 1
Assay carried out by core lab or investigator's lab?	D	investigator's lab	N/A
Acknowledgement of authors' contributions	D	N/A	N/A
SAMPLE
Description	E	Cell resources	Page 7, line 1
Volume/mass of sample processed	D	N/A	N/A
Microdissection or macrodissection	E	Cell resources	Page 7, line 1
Processing procedure	E	Cell resources	Page 7, line 1
If frozen - how and how quickly?	E	Cell resources	Page 7, line 1
If fixed - with what, how quickly?	E	Cell resources	Page 7, line 1
Sample storage conditions and duration (especially for FFPE samples)	E	Cell resources	Page 7, line 1
NUCLEIC ACID EXTRACTION
Procedure and/or instrumentation	E	Lyse cells, remove DNA, remove protein and salt, elute RNA; centrifuge, DNA-Cleaning Column, RNA-only Column	Page 7, line 1
Name of kit and details of any modifications	E	FORGENE, Cell Total RNA Isalation Kit	Page 7, line 1
Source of additional reagents used	D	None	N/A
Details of DNase or RNAse treatment	E	DNA-Cleaning Column	Page 7, line 1
Contamination assessment (DNA or RNA)	E	DNA	Page 7, line 1
Nucleic acid quantification	E	NanoDrop, RNA measure	Page 7, line 1
Instrument and method	E	NanoDrop, RNA measure	Page 7, line 1
Purity (A260/A280)	D	N/A	N/A
Yield	D	N/A	N/A
RNA integrity method/instrument	E	N/A	N/A
RIN/RQI or Cq of 3' and 5' transcripts	E	N/A	N/A
Electrophoresis traces	D	N/A	N/A
Inhibition testing (Cq dilutions, spike or other)	E	N/A	N/A
REVERSE TRANSCRIPTION
Complete reaction conditions	E	37℃, 15min; 85℃, 5s; 4℃, forever	Page 7, line 2-3
Amount of RNA and reaction volume	E	2ug, 40ul	Page 7, line 2-3
Priming oligonucleotide (if using GSP) and concentration	E	25pmol	Page 7, line 2-3
Reverse transcriptase and concentration	E	N/A	Page 7, line 2-3
Temperature and time	E	37℃, 15min	Page 7, line 2-3
Manufacturer of reagents and catalogue numbers	D	Takara, RR037A	Page 7, line 2-3
Cqs with and without RT	D*	N/A	N/A
Storage conditions of cDNA	D	-80℃	Page 7, line 2-3
qPCR TARGET INFORMATION
If multiplex, efficiency and LOD of each assay.	E	N/A	N/A
Sequence accession number	E	N/A	N/A
Location of amplicon	D	N/A	N/A
Amplicon length	E	20-23	Page 7, line 3-5
In silico specificity screen (BLAST, etc)	E	N/A	N/A
Pseudogenes, retropseudogenes or other homologs?	D	N/A	N/A
Sequence alignment	D	N/A	N/A
Secondary structure analysis of amplicon	D	N/A	N/A
Location of each primer by exon or intron (if applicable)	E	N/A	N/A
What splice variants are targeted?	E	N/A	N/A
qPCR OLIGONUCLEOTIDES
Primer sequences	E	Caspase1-F：GAAAAGCCATGGCCGACAAG；Caspase1-R：GCTGTCAGAGGTCTTGTGCT； Caspase3-F：CATGGAAGCGAATCAATGGACT；Caspase3-R：CTGTACCAGACCGAGATGTCA； GSDMD-F：GTGTGTCAACCTGTCTATCAAGG；GSDMD-R：CATGGCATCGTAGAAGTGGAAG； GSDME-F：ACATGCAGGTCGAGGAGAAGT；GSDME-R：TCAATGACACCGTAGGCAATG	Page 7, line 3-5
RTPrimerDB Identification Number	D	N/A	N/A
Probe sequences	D**	N/A	N/A
Location and identity of any modifications	E	None	None
Manufacturer of oligonucleotides	D	N/A	N/A
Purification method	D	N/A	N/A
qPCR PROTOCOL
Complete reaction conditions	E	Hold Stage:1.6℃/s, 95℃, 30s; PCR Stage: (1.6℃/s, 95℃, 10s, 1.6℃/s, 60℃,30s) 40×; Melt Curve Stage: 1.6℃/s,95℃, 15s; 1.6℃/s,60℃, 1min; 0.15℃/s, 95℃,1s	Page 7, line 3-5
Reaction volume and amount of cDNA/DNA	E	20ul, 8ul	Page 7, line 3-5
Primer, (probe), Mg++ and dNTP concentrations	E	10uM	Page 7, line 3-5
Polymerase identity and concentration	E	Protect from light	Page 7, line 3-5
Buffer/kit identity and manufacturer	E	Vazyme	Page 7, line 3-5
Exact chemical constitution of the buffer	D	N/A	N/A
Additives (SYBR Green I, DMSO, etc.)	E	SYBR	Page 7, line 3-5
Manufacturer of plates/tubes and catalog number	D	Nest	Page 7, line 3-5
Complete thermocycling parameters	E	1.6℃/s, 95℃, 10s; 1.6℃/s,60℃, 30s; 40×	Page 7, line 3-5
Reaction setup (manual/robotic)	D	manual	Page 7, line 3-5
Manufacturer of qPCR instrument	E	Thermo Fisher	Page 7, line 3-5
qPCR VALIDATION
Evidence of optimisation (from gradients)	D	N/A	N/A
Specificity (gel, sequence, melt, or digest)	E	Melt	Page 7, line 3-5
For SYBR Green I, Cq of the NTC	E	N/A	N/A
Standard curves with slope and y-intercept	E	N/A	N/A
PCR efficiency calculated from slope	E	N/A	N/A
Confidence interval for PCR efficiency or standard error	D	N/A	N/A
r2 of standard curve	E	N/A	N/A
Linear dynamic range	E	N/A	N/A
Cq variation at lower limit	E	N/A	N/A
Confidence intervals throughout range	D	N/A	N/A
Evidence for limit of detection	E	N/A	N/A
If multiplex, efficiency and LOD of each assay.	E	N/A	N/A
DATA ANALYSIS
qPCR analysis program (source, version)	E	QuantStudio™ 3 System	Page 7, line 4-7
Cq method determination	E	Standard Curve	Page 7, line 4-7
Outlier identification and disposition	E	Delete	Page 7, line 4-7
Results of NTCs	E	N/A	N/A
Justification of number and choice of reference genes	E	GAPDH	Page 7, line 4-7
Description of normalisation method	E	2-ΔΔCt method	Page 7, line 4-7
Number and concordance of biological replicates	D	N/A	N/A
Number and stage (RT or qPCR) of technical replicates	E	Three	Page 7, line 4-7
Repeatability (intra-assay variation)	E	Standard difference	Page 7, line 4-7
Reproducibility (inter-assay variation, %CV)	D	N/A	N/A
Power analysis	D	N/A	N/A
Statistical methods for result significance	E	The qPCR data were used for subsequent Pearson correlation analysis.	Page 7, line 4-7
Software (source, version)	E	Graphpad Prism 9	Page 7, line 4-7
Cq or raw data submission using RDML	D	N/A	N/A
Table 1. MIQE checklist for authors, reviewers and editors. All essential information (E) must be submitted with the manuscript. Desirable
information (D) should be submitted if available. If using primers obtained from RTPrimerDB, information on qPCR target, oligonucleotides,
protocols and validation is available from that source.
*: Assessing the absence of DNA using a no RT assay is essential when first extracting RNA. Once the sample has been validated as
RDNA-free, inclusion of a no-RT control is desirable, but no longer essential.
**: Disclosure of the probe sequence is highly desirable and strongly encouraged. However, since not all commercial pre-designed assay
vendors provide this information, it cannot be an essential requirement. Use of such assays is advised against.
